# Supplementary material
Source: Springer Nature journal article supplement (https://www.springerprofessional.de/resource/supplementary/13673_2011_15_MOESM15_ESM.pdf/11899340)

### HC Base - Utilised memory

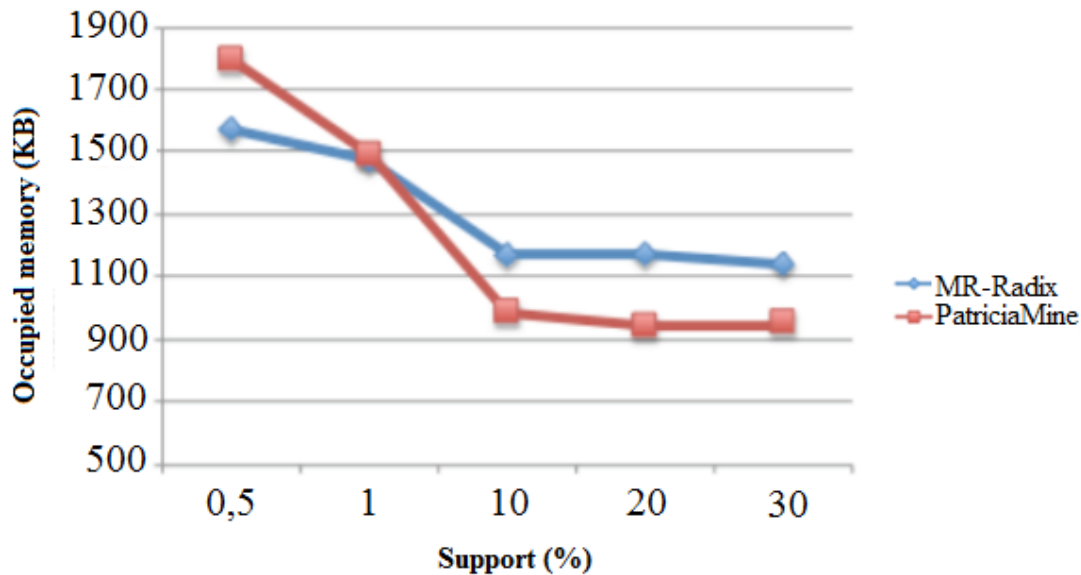

Supplement: MOESM15 [file 11899340]
